# Supplementary material for: The interaction of Mozobil™with carboxylates
Source: Royal Society of Chemistry journal article supplement (doi:10.1039/c5ob01704a), 2015-11-10
Supplement: c5ob01704a1.pdf [file c5ob01704a1.pdf]

## The Interaction of Mozobil™ with Carboxylates

Valeria Amendola, Greta Bergamaschi, Luigi Fabbrizzi,\* Maurizio Licchelli, and Carlo Mangano

### Electronic Supplementary Information

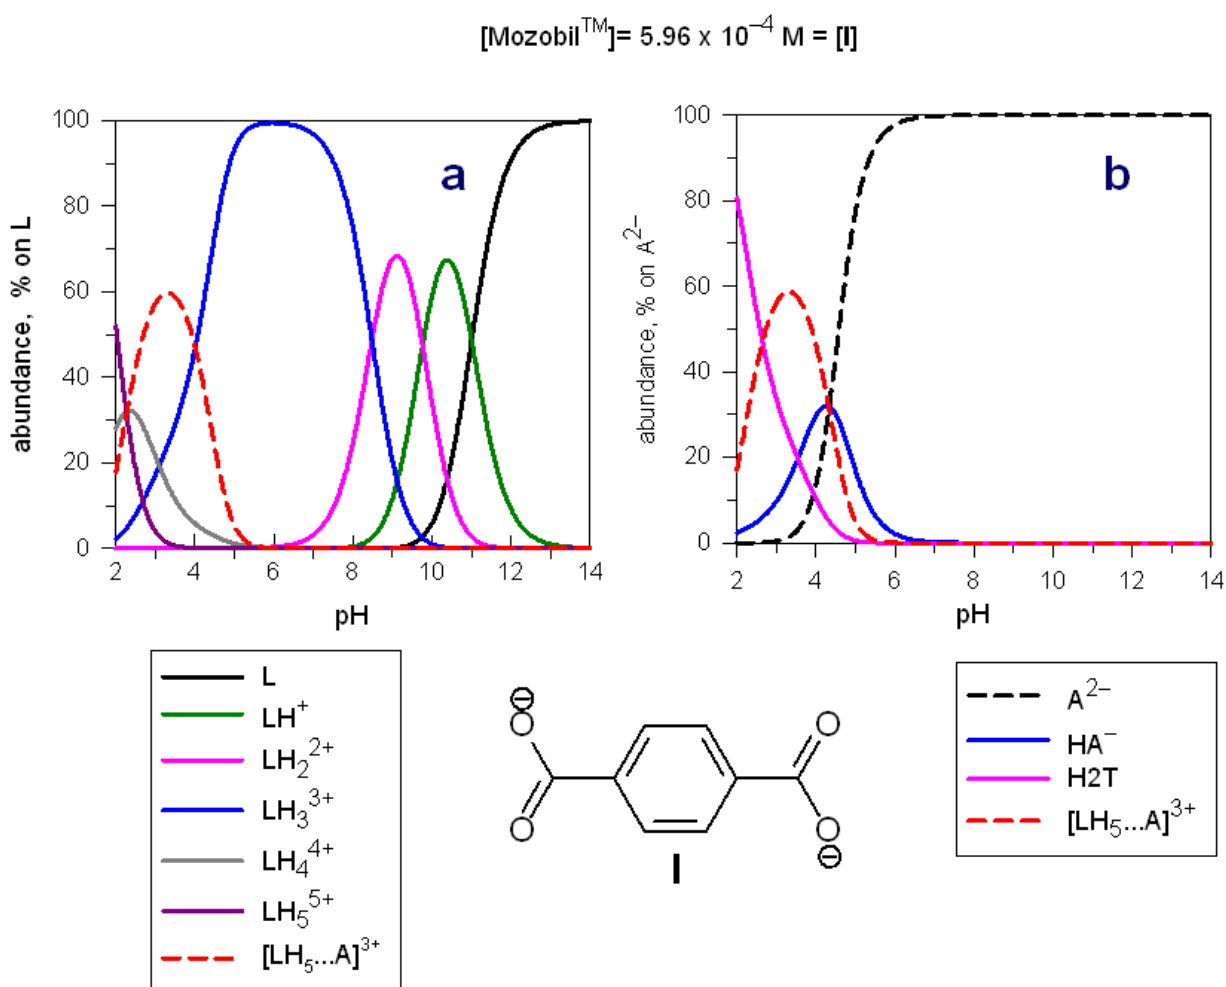

**Fig. ESI 1.** Distribution diagram of the species at the equilibrium in the 2-14 pH range: (a) concentrations calculated on L (Mozobil™); (b) concentrations calculated on dicarboxylate **I** (terephthalate).

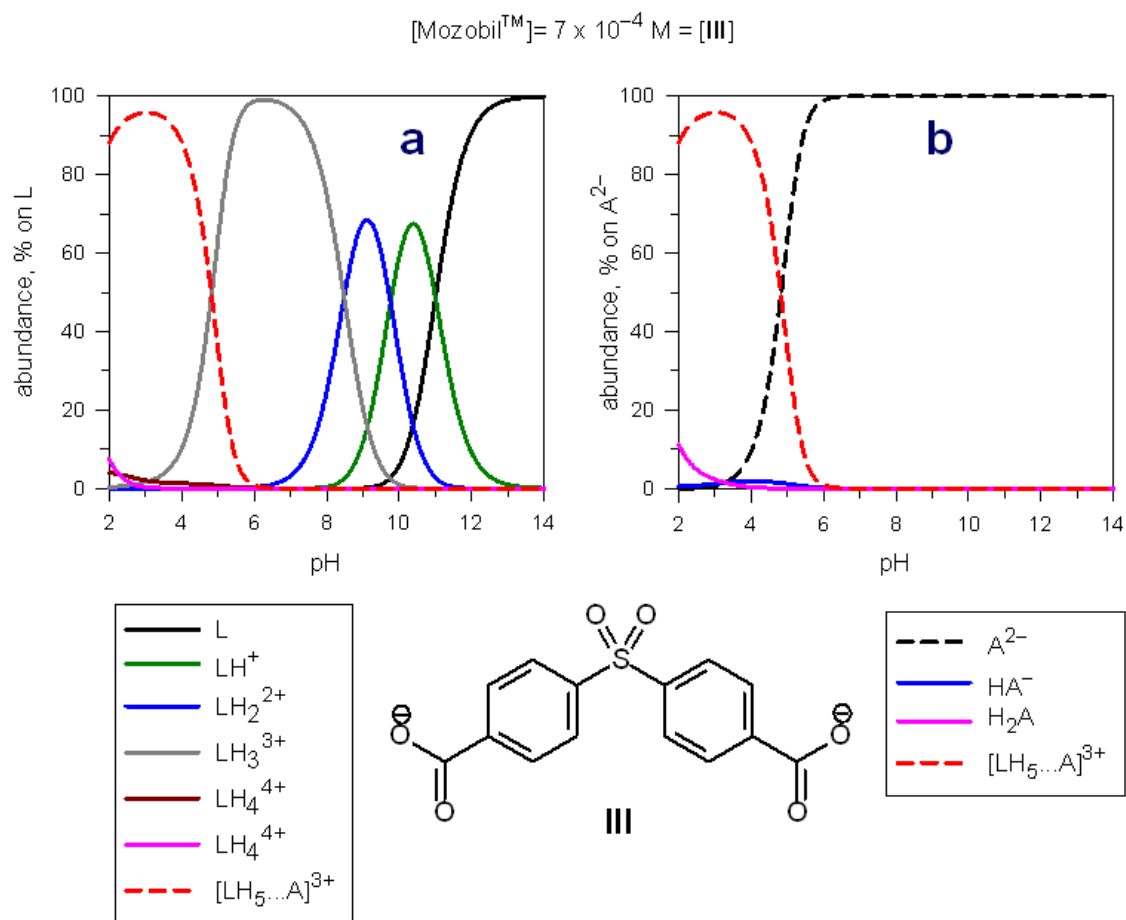

**Fig. ESI 2.** Distribution diagram of the species at the equilibrium in the 2-14 pH range: (a) concentrations calculated on L (Mozobil<sup>TM</sup>); (b) concentrations calculated on dicarboxylate III.

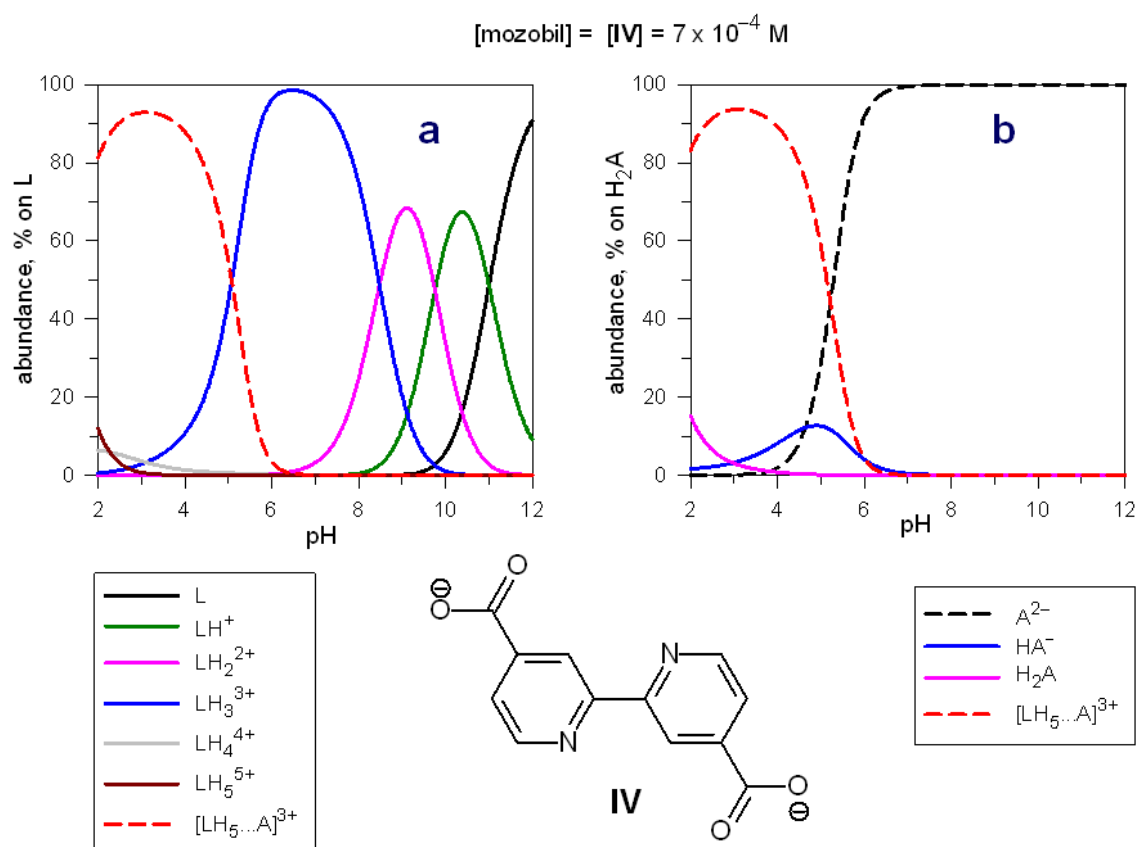

**Fig. ESI 3.** Distribution diagram of the species at the equilibrium in the 2-12 pH range: (a) concentrations calculated on L (Mozobil™); (b) concentrations calculated on dicarboxylate IV.

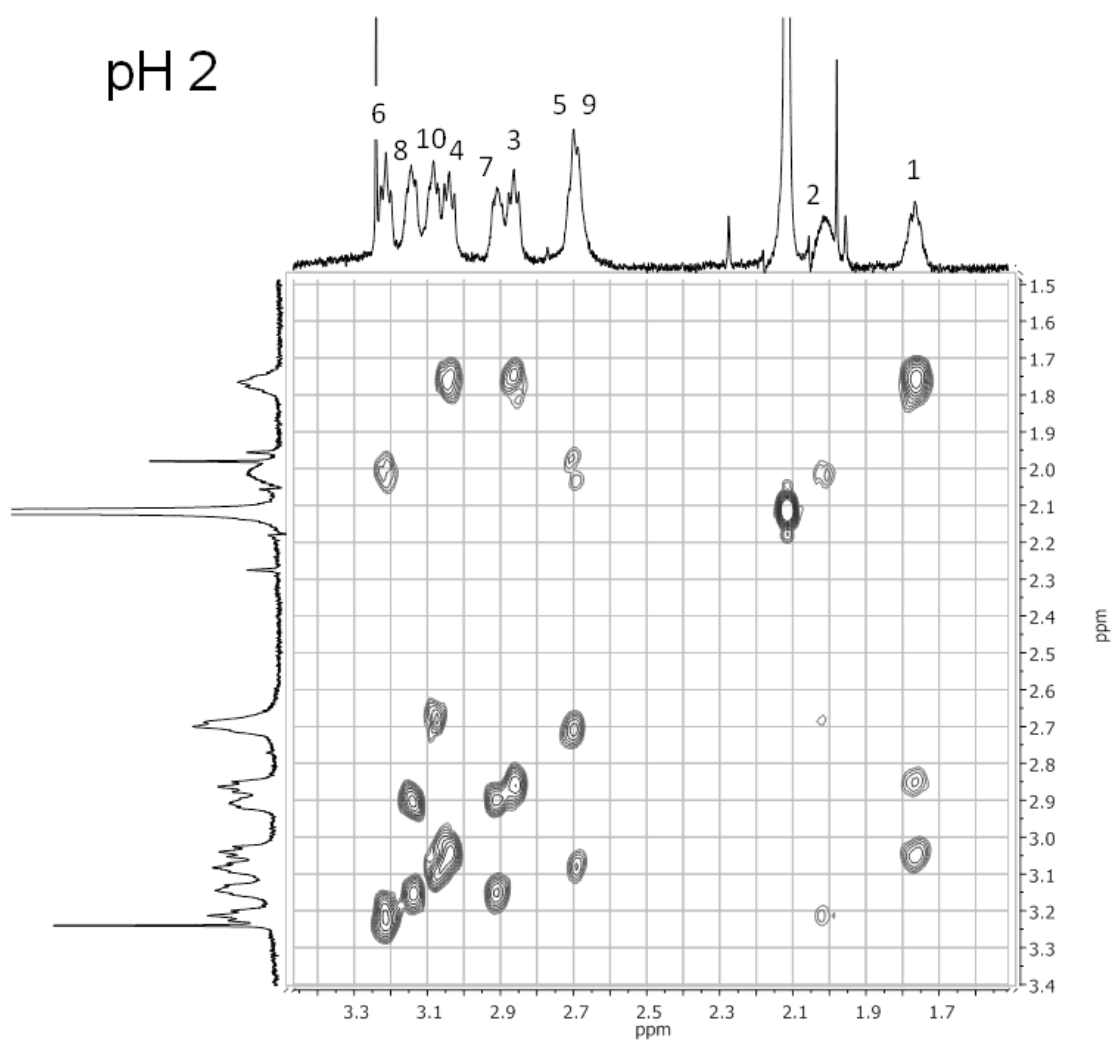

**Fig. ESI 4.** COSY spectrum of Mozobil<sup>TM</sup>  $5 \times 10^{-4}$  M in D<sub>2</sub>O (0.1 M NaNO<sub>3</sub>) adjusted at pH 2.

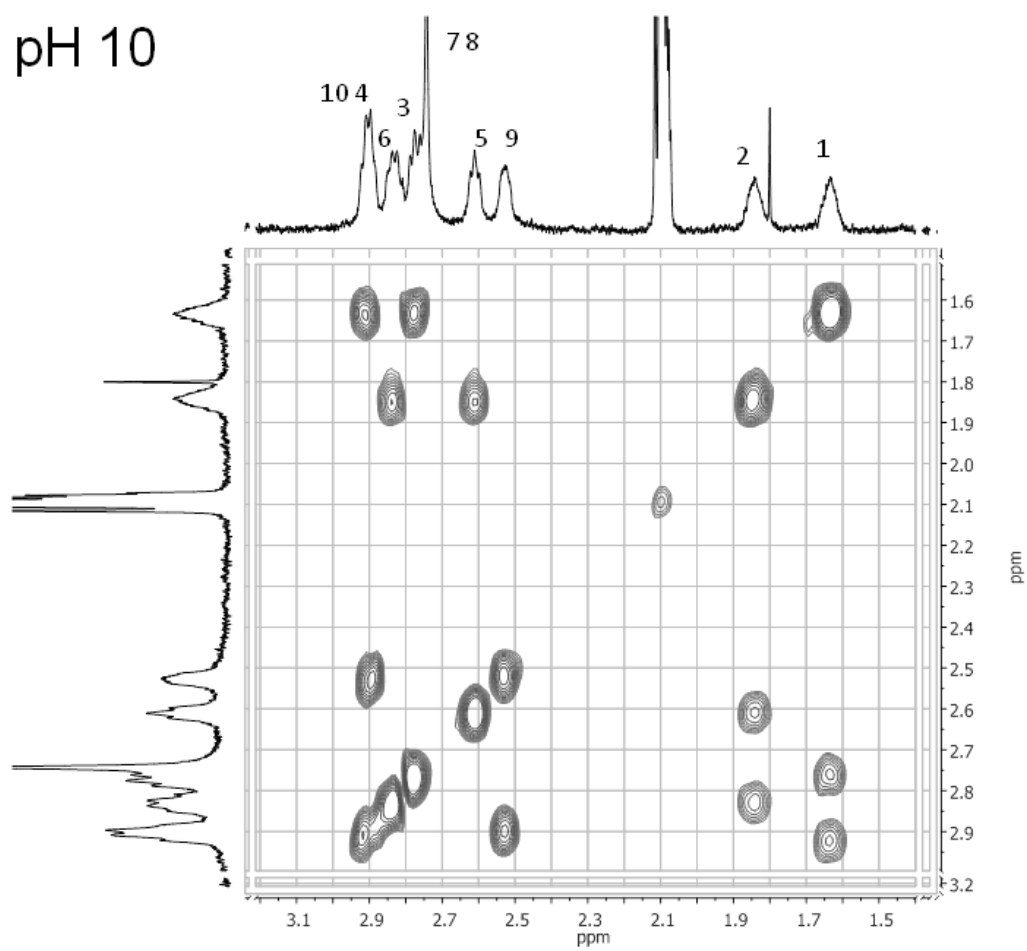

**Fig. ESI 5.** COSY spectrum of Mozobil™  $5 \times 10^{-4}$  M in D<sub>2</sub>O (0.1 M NaNO<sub>3</sub>) adjusted at pH 10.
